# Supplementary material for: Human expansion precipitates niche expansion for an opportunistic apex predator (Puma concolor)
Source: PubMed Central journal article supplement (PMC5180354; doi:10.1038/srep39639), 2016-12-23
Supplement: srep39639-s1.pdf [file srep39639-s1.pdf]

Niche expansion in an apex predator

1 **Human expansion precipitates niche expansion for an opportunistic apex predator**  
2 **(*Puma concolor*)**

3

4 Wynne E. Moss<sup>1\*</sup>, Mathew W. Alldredge<sup>2</sup>, Kenneth A. Logan<sup>2</sup>, and Jonathan N. Pauli<sup>1</sup>

5

6 <sup>1</sup> Department of Forest & Wildlife Ecology, University of Wisconsin, Madison,

7 Wisconsin 53706, USA

8 <sup>2</sup>Colorado Parks & Wildlife, Fort Collins, Colorado, 80525, USA

9

10 \*wmoss@wisc.edu

11

SUPPLEMENTARY INFORMATION

12 **Study areas**

13 We conducted our study in two regions of Colorado, which represent extremes in human  
14 influence. The wildland site, located in the Uncompahgre Plateau (Fig. S1), varies in  
15 elevation from about 1,700 m to 3,000 m. The most abundant large herbivores in the  
16 wildland study area are mule deer (*Odocoileus hemionus*) and elk (*Cervus elaphus*),  
17 although sheep and cattle range within the study area during the summer months. Human  
18 population density and road density are low, and over half of the land-cover is publicly  
19 owned and undeveloped (Table S1). The urban interface site, located in the Northern  
20 Front Range (Fig. S1), ranges from 1,600 to 4,300 m in elevation. The south-eastern part  
21 of the urban interface site lies within the boundary of the expanding Denver metropolis,  
22 while the south-western part of the study area is primarily publicly owned wildland; thus,  
23 this study area is a matrix of both developed and undeveloped habitat (Table S1). We  
24 sampled cougars within both of these study areas from 2008-2013, as well as cougars  
25 living in the urban interface study area in the 1980s, which we refer to as the historic  
26 urban interface. In the 1980s, there was 25% less developed habitat and 20% fewer  
27 people in the urban interface study area, though the level of habitat development and  
28 human density was still higher than observed in the wildland study area. Cougar density  
29 in the wildland study site was at least 2.5 independent cougars per 100 km<sup>2</sup>;<sup>1</sup>, with  
30 densities in the contemporary urban interface likely between 2 and 3 (Colorado Parks &  
31 Wildlife unpublished data).

32 We quantified measures of anthropogenic influence within our study areas, as  
33 given by housing density, road density, and human population density. We obtained

## Niche expansion in an apex predator

34 population counts at the census block group level in the contemporary sites<sup>2</sup> and the  
35 historic sites<sup>3</sup>. We selected all the census block groups whose centroid lay within the  
36 bounds of the study site and summed their populations. Density was calculated by  
37 dividing total population by the area of all selected census block groups. To determine  
38 road density, we used TIGER/Line shapefiles<sup>4</sup> to quantify the km of road per km<sup>2</sup> study  
39 area.

40 Housing density and land use categories for historic and contemporary study sites  
41 were taken from the SERGoM model of housing density<sup>5</sup>; we used the 1990 historical  
42 data layer for the historic urban interface study site and the projected 2010 layers for the  
43 contemporary sites. We refer to exurban, suburban, or urban habitat (> 5 units/km<sup>2</sup>) as  
44 “developed”. Undeveloped habitat contained no houses, while rural habitat was between  
45 0.01 and 6 units/km<sup>2</sup>.

46 Finally, to determine if changes in ungulate density were driving changes in diet,  
47 we examined mule deer population trends within the urban interface site from 1988 to  
48 2010. Estimates of post-hunt population in the Boulder Creek deer herd (which overlaps  
49 with the urban interface study area) were taken from Colorado Parks & Wildlife reports<sup>6</sup>.  
50 Mule deer abundance and density did not change in the urban interface since the late  
51 1980s (Fig. S3), therefore, differences in diet over time are unlikely to be the result of  
52 changing ungulate availability.

### 53 **Capture and isotopic sampling**

54 Cougars in the wildland and urban interface site were captured and monitored from 2008-  
55 2013 as part of a larger on-going study by Colorado Parks & Wildlife<sup>7,8</sup>. Sub-adult and  
56 adult cougars were captured using dogs, cage traps, and snares, and immobilized with

## Niche expansion in an apex predator

57 tiletamine hydrochloride (Telazol) or ketamine hydrochloride-medetomidine. Hair  
58 samples for isotopic analysis were taken either at captures or necropsies (Table S2). All  
59 animal handling was in accordance with ACUC 16-2008 and 08-2004 approved by  
60 Colorado Parks & Wildlife, Fort Collins, CO. We searched state records for cougars  
61 harvested within our study area between 1970 and 1990 and requested samples from  
62 hunters. We also queried museum databases for samples within 50 km of our study area  
63 prior to 1990 (Table S3).

64 We collected over 140 hair samples from over 15 prey species, which we  
65 identified as being potentially important due to their prevalence at kill sites within our  
66 study area or from previous studies of cougar diet<sup>9,10</sup>. Hair samples from wild prey  
67 species were collected at cougar kill sites or road kills in both study areas. We sampled  
68 domestic species in the wildland-urban study site using shed hairs from farms or  
69 veterinary clinics, and assumed that domestic species would not vary geographically due  
70 to a high reliance on commercial feed rather than wild plants. We did not sample prey  
71 from the 1980s in the urban interface site, but assumed that prey isotopic signature did  
72 not change over time.

73

### 74 **Isotopic analysis**

75 Hair samples from cougar and prey were rinsed in a 2:1 mixture of chloroform: methanol,  
76 dried for 72 hours, and homogenized, following standard methods<sup>11</sup>. Samples were  
77 analysed using a Carlo Erba 1100 Elemental Analyzer coupled to a Thermo Delta Plus  
78 XP IRMS. Results are reported as parts per thousand [‰] ratios relative to international  
79 standards of Peedee Belemnite (PDB;  $\delta^{13}\text{C}$ ) and atmospheric nitrogen (AIR;  $\delta^{15}\text{N}$ ). We

## Niche expansion in an apex predator

80 adjusted prey isotopic signatures using isotopic correction factors for carnivores ( $\delta^{13}\text{C} =$   
81  $+2.6\text{‰}$ ;  $\delta^{15}\text{N} = +3.4\text{‰}$ <sup>12</sup>). After correction, we grouped prey into biologically relevant and  
82 isotopically distinct source groups using a K nearest-neighbour randomization test<sup>13</sup>.  
83 Synanthropic wildlife from the wildland and urban interface sites did not differ (K  
84 nearest-neighbour;  $p > 0.05$ ); however, the native herbivore group differed in  $\delta^{15}\text{N}$  among  
85 study areas ( $p < 0.01$ ). Therefore, with the exception of the native herbivore group, we  
86 used identical prey isotopic signatures in mixing models for all three populations. The  
87 native herbivore group contains rabbits, elk, and deer, but, because ungulates are an order  
88 of magnitude larger, use of this prey group reflects mostly consumption of ungulates,  
89 rather than small mammals.

90 We corrected the  $\delta^{13}\text{C}$  signatures of historic cougar samples to account for the  
91 Suess effect, or the decrease in atmospheric  $^{13}\text{C}$  from fossil fuel burning<sup>14</sup>. We applied a -  
92  $0.022\text{‰}$  per year correction<sup>15</sup>. To compare differences in raw isotopic signature between  
93 cougar populations, we used K nearest-neighbour tests.

94 We computed a corrected standard ellipse ( $\text{SE}_C$ ) for each population in the  
95 program SIAR<sup>16</sup>, with the area of each ellipse ( $\text{SEA}_C$ ) representing amount of isotopic  
96 variation within a population. Compared with convex hull or standard deviation methods,  
97 estimates of  $\text{SEA}_C$  are more robust to differences in sample size and are, therefore, a  
98 useful measure of niche breadth when sample sizes differ among groups, as in our  
99 study<sup>17</sup>.

100 However, because standard ellipses are, themselves, estimates of uncertainty<sup>18</sup>,  
101 the area of an ellipse does not have an associated variance estimate. In order to derive an  
102 estimate of variance and test the robustness of  $\text{SEA}_C$  estimates to sample sizes and

103 outliers, we utilized a bootstrapping approach. First, given the small sample size of the  
104 historic urban interface population ( $n = 9$ ), we tested the sensitivity of  $SEA_C$  estimates to  
105 outliers. We calculated  $SEA_C$  after excluding one sample, and repeated this nine times,  
106 dropping a different sample each time.  $SEA_C$  varied little, from 0.4 – 0.7, suggesting no  
107 individual sample was overly influential (Fig. S2). Next, we used a similar process for the  
108 contemporary urban and contemporary wildland datasets. Nine individuals were  
109 randomly drawn from each sample set, and  $SEA_C$  was estimated for those nine  
110 individuals. We repeated this sampling nine times, to generate a distribution similar to the  
111 one generated for the historic urban interface (Fig. S2). We compared each simulated  
112 distribution with the historic urban interface distribution using a Welch's t-test. We also  
113 compared the contemporary wildland and contemporary urban distributions to one  
114 another. We repeated this process 1000 $\times$ , and calculated an average p-value and median  
115  $SEA_C$  (Fig. S2).

116         Though  $SEA_C$  provides a useful estimate of niche *breadth*, we could not directly  
117 compare niche *overlap* (as measured by  $SE_C$  overlap in bi-plots) between cougar  
118 populations because the position of the  $SE_C$  can be influenced by variation in prey  
119 signature among groups, and may not necessarily reflect differences in foraging strategy  
120 <sup>18</sup>. Thus, we estimated diet compositions for populations in SIAR, which allowed us to  
121 compare niche overlap independent of differences in the isotopic signature of prey, as in  
122 Flaherty and Ben-David<sup>19</sup>. To estimate diet, SIAR uses Markov Chain Monte Carlo  
123 simulations to generate a distribution of possible diets that are consistent with consumer  
124 and prey isotopic signatures<sup>15</sup>. The output is given as Bayesian posterior distributions of  
125 possible solutions<sup>20</sup>. We report diet as 95% Bayesian credibility intervals of these

## Niche expansion in an apex predator

126 distributions, which represents the most likely diet for an entire population. We grouped  
127 small and large domestic species *a posteriori* because, though they differed isotopically,  
128 the model could not accurately distinguish between these two sources.

129         Finally, to test whether differences between study areas were influenced by the  
130 demographic composition of samples, we ran analyses using only adults from the two  
131 contemporary populations. Because adults are more likely than subadults to consume  
132 large-bodied native herbivores<sup>21</sup>, it is possible that differences in the demographic  
133 structure of the three sample sets (Table S2) could influence estimates of native herbivore  
134 use. Restricting the analysis to adults only in the contemporary population is the most  
135 conservative approach, given that adults have the most ungulate specialized diets. We  
136 retained subadults and unknown age individuals ( $n = 3$ ) in the historic urban interface  
137 population, because if anything, this would increase our estimate of alternative prey and  
138 thus dietary breadth. With this new analysis, adults in the contemporary urban interface  
139 still had broader isotopic niches and relied less on native herbivores than the historic  
140 population (Table S5), and estimates of diet and niche breadth varied only slightly.  
141 Similarly, restricting analyses to adults only in the wildland population also did not  
142 change results significantly (Table S5). Thus, the patterns still held true, with isotopic  
143 niche the largest and reliance on native herbivores the lowest in contemporary urban  
144 interface cougars. Therefore, to maximize sample sizes and avoid confusion, we report  
145 full results from analyses of the entire sample sets.





**Tables**

**Table S1.** Measures of anthropogenic influence in Colorado study areas where we sampled cougars (*Puma concolor*). The wildland study site shows the lowest amount of anthropogenic influence and the contemporary urban interface study site the highest. In the 1980s, the urban interface site was intermediate for all measures of anthropogenic influence. Land use estimates and classifications were derived from the SERGoM model of housing density<sup>5</sup> and are given as % area.

|                                          | Wildland<br>(contemporary) | Urban interface<br>(historic) | Urban interface<br>(contemporary) |
|------------------------------------------|----------------------------|-------------------------------|-----------------------------------|
| Human density (persons/km <sup>2</sup> ) | 7                          | 33                            | 41                                |
| Road density (km roads/km <sup>2</sup> ) | 1.1                        | *                             | 2.3                               |
| <b>Land use (% total area)</b>           |                            |                               |                                   |
| Undeveloped                              | 72                         | 58                            | 56                                |
| Rural                                    | 22                         | 19                            | 14                                |
| Exurban                                  | 6                          | 21                            | 28                                |
| Suburban                                 | < 1                        | 1                             | 1                                 |
| Urban                                    | < 1                        | < 1                           | < 1                               |
| Total area (km <sup>2</sup> )            | 2898                       | 2869                          | 2869                              |

\*Digitized maps of roads during the 1980s were not available for our study area.

**Table S2.** Age-sex classes of cougars sampled in contemporary wildland and urban interface study sites. Ages were determined using Logan's<sup>21</sup> criteria. Adults were individuals > 24 months who had established a home range and sub-adults were independent individuals < 24 months old.

| Study site                   | Age-sex class           | <i>N</i> | % of total sample |
|------------------------------|-------------------------|----------|-------------------|
| Wildland                     | Adult female            | 24       | 41                |
|                              | Adult male              | 11       | 19                |
|                              | Sub-adult female        | 9        | 16                |
|                              | Sub-adult male          | 14       | 24                |
| Contemporary urban interface | Adult female            | 21       | 51                |
|                              | Adult male              | 7        | 17                |
|                              | Sub-adult female        | 7        | 17                |
|                              | Sub-adult male          | 6        | 15                |
| Historic urban interface     | Adult female            | 2        | 22                |
|                              | Adult male              | 4        | 44                |
|                              | Sub-adult (unknown sex) | 1        | 11                |
|                              | Unknown                 | 2        | 22                |

Niche expansion in an apex predator

**Table S3.** Historic samples collected from the urban interface study area in Colorado.

Samples were obtained from museums or from mounts. We report accession numbers for museum samples.

| Source                               | Mortality | Age-sex class      | Year | Accession number |
|--------------------------------------|-----------|--------------------|------|------------------|
| Mount                                | Harvested | Adult male         | 1983 |                  |
| Mount                                | Harvested | Adult male         | 1983 |                  |
| Mount                                | Harvested | Adult male         | 1986 |                  |
| Mount                                | Roadkill  | Subadult<br>female | 1989 |                  |
| Mount                                | Harvested | Adult female       | 1986 |                  |
| Mount                                | Harvested | Adult male         | 1983 |                  |
| Denver Museum of Nature<br>& Science | Unknown   | Unknown<br>female  | 1988 | DMN ZM.7699      |
| Museum of Southwestern<br>Biology    | Agency    | Adult female       | 1988 | MSB:111939       |
| Museum of Southwestern<br>Biology    | Unknown   | Unknown<br>female  | 1990 | MSB: 115606      |

Niche expansion in an apex predator

**Table S4.** Isotopic signatures and diet estimates for three cougar (*Puma concolor*) populations in Colorado. Dietary estimates are derived from Bayesian mixing models; we give the mean and 95% Bayesian credibility interval (CI) from simulations to estimate diet. The wildland population shows the highest reliance on native herbivores, followed by the historic urban interface population. The contemporary urban interface population relies most heavily upon alternative prey species.

| Study Area      | Time                     | <i>n</i> | Isotopic signature: $\bar{x} \pm SD$ |                    | Dietary contribution: $\bar{x}$ (95% CI) |                  |                       |
|-----------------|--------------------------|----------|--------------------------------------|--------------------|------------------------------------------|------------------|-----------------------|
|                 |                          |          | $\delta^{13}C$ (‰)                   | $\delta^{15}N$ (‰) | Native herbivores                        | Domestic species | Synanthropic wildlife |
| Wildland        | Contemporary (2008-2013) | 58       | -21.6 ± 0.5                          | 8.5 ± 0.5          | 96% (91-99%)                             | 4% (1-8%)        | 1% (0-3%)             |
| Urban interface | Historic (1983-1990)     | 7        | -21.6 ± 0.5                          | 6.9 ± 0.6          | 85% (73-95%)                             | 11% (1-21%)      | 5% (0-12%)            |
| Urban interface | Contemporary (2008-2013) | 41       | -21.3 ± 0.65                         | 8.1 ± 0.8          | 71% (63-79%)                             | 23% (13-33%)     | 5% (0-12%)            |

## Niche expansion in an apex predator

**Table S5.** Results of analysis to test the impacts of demographic (i.e. subadult vs. adult) representation in samples. We restricted contemporary samples to adults only to enable direct comparisons of diet and niche breadth, and to reduce possible effects of differences in demographic structure of samples. We compared contemporary adult cougars to the full sample of historic cougars, which included subadult individuals. Our analysis demonstrated that patterns of niche expansion and dietary shifts were robust to the demographic classes sampled.

| Population                   | Full population analysis                     |                            | Adults-only analysis                         |                            |
|------------------------------|----------------------------------------------|----------------------------|----------------------------------------------|----------------------------|
|                              | Dietary contribution from native herbivores* | Isotopic niche ( $SEA_C$ ) | Dietary contribution from native herbivores* | Isotopic niche ( $SEA_C$ ) |
| Contemporary urban interface | 63–79%                                       | 1.1                        | 65–84%                                       | 1.0                        |
| Contemporary wildland        | 84–98%                                       | 0.7                        | 91–99%                                       | 0.6                        |
| Historic urban interface     | 73–95%                                       | 0.6                        | N/A                                          | N/A                        |

\*95% Bayesian credibility interval

# Niche expansion in an apex predator

## Figures

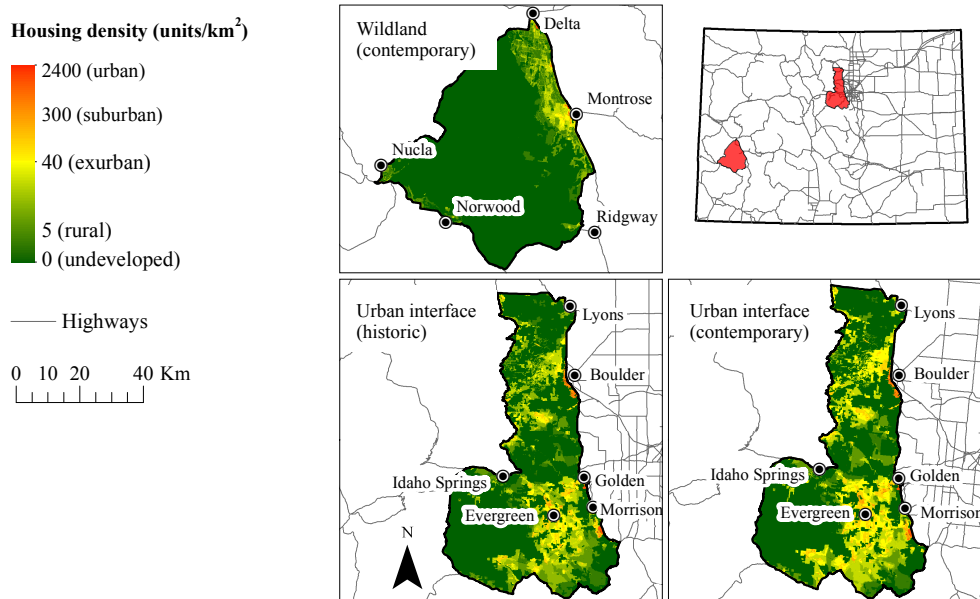

**Figure S1.** Study areas in Colorado, where we sampled cougars (*Puma concolor*) for isotopic analysis. The wildland study site, which was sampled from 2008 – 2013, is located on the Uncompahgre Plateau of west-central Colorado, which has little anthropogenic influence. The Northern Front Range of Colorado is an expanding urban-wildland interface; we sampled this site in the 1980s (urban interface historic) and from 2008-2013 (urban interface contemporary). Housing density is classified with SERGoM housing density raster layers<sup>5</sup> using 2010 data for contemporary land use and 1990 data for historic land use. Maps were created using ArcGIS software and base maps (Version 10.2, Esri, [www.esri.com](http://www.esri.com)).

## Niche expansion in an apex predator

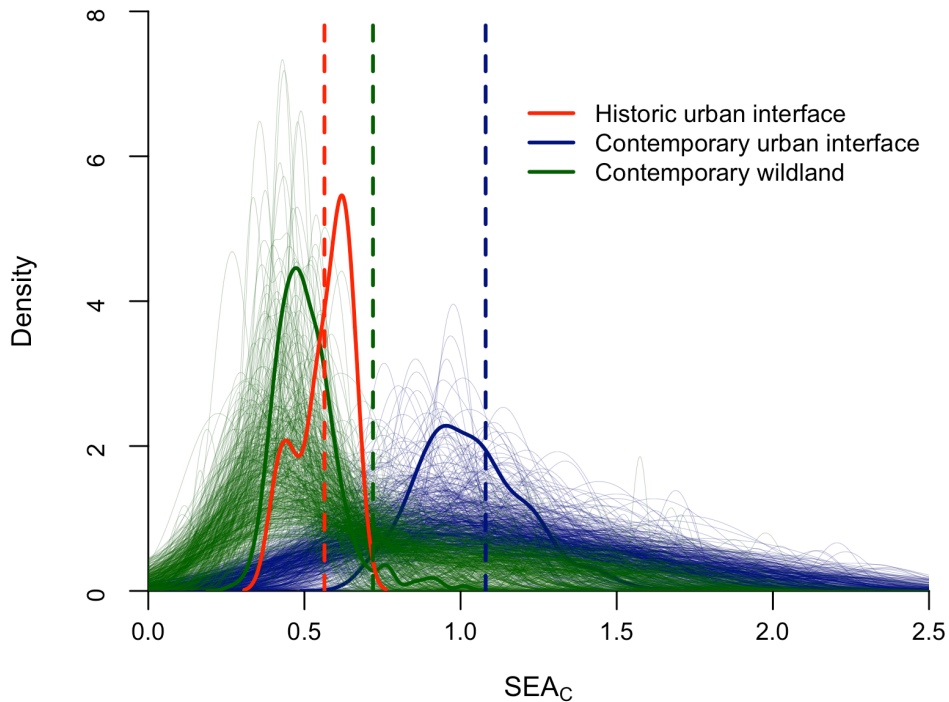

**Figure S2.** Bootstrapped comparison of  $SEAC_C$  (corrected standard ellipse areas) between cougar (*Puma concolor*) populations. For the contemporary urban interface and wildland populations, we randomly drew nine individuals from the larger sample set and calculated  $SEAC_C$ ; this was repeated nine times to give a distribution of  $SEAC_C$  estimates (a single thin line). We repeated this 1000 times and plotted the median distribution (heavy line). For the historic urban interface population ( $n=9$ ), we randomly dropped one sample and calculated  $SEAC_C$  for the remaining samples, and repeated this for all possible combinations, giving one distribution (in red). Non-bootstrapped estimates of  $SEAC_C$  (dashed lines) are also shown.

## Niche expansion in an apex predator

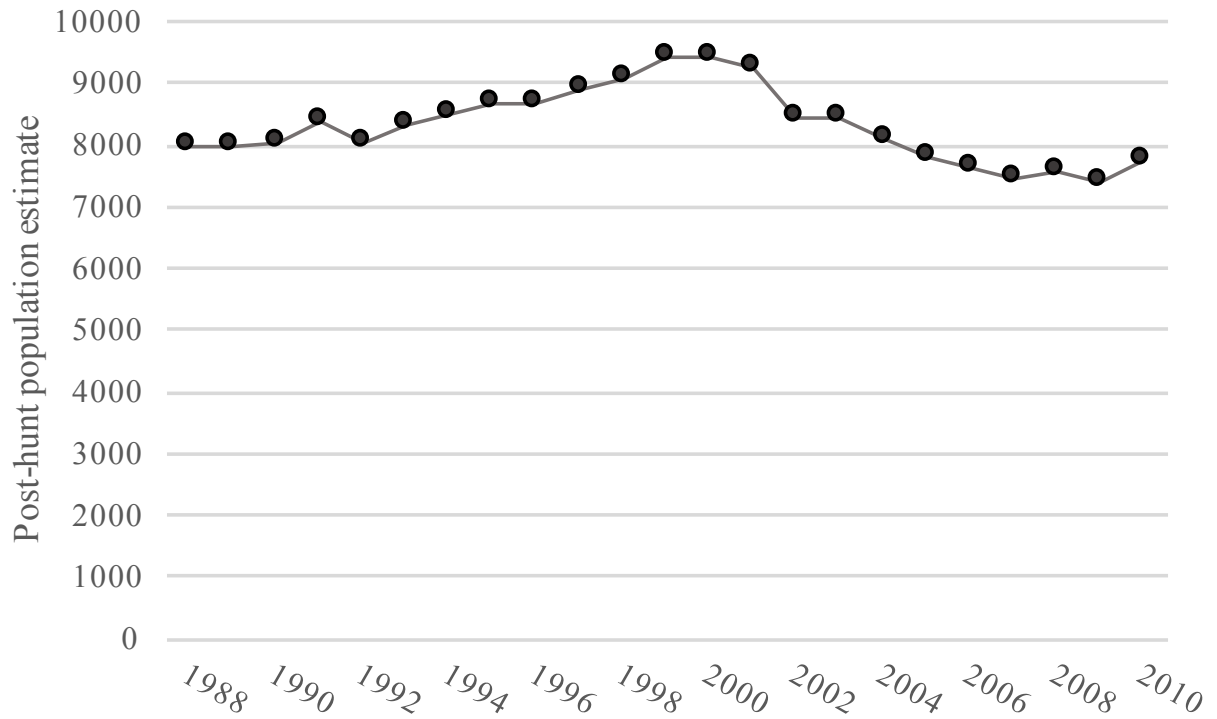

**Figure S3.** Estimates of population size for the deer herd in the Boulder Creek Deer Herd management unit . The urban interface study area is located within this management unit. Estiamtes are modeled post-hunt populations, gathered by Colorado Parks & Wildlife<sup>6</sup>. Deer abundance was near 8000 for both historic (1980s) and contemporary (2007-2013) sampling periods, although pre-1988 estimates were not available.



## References

1. Logan, K. A. Puma population structure and vital rates on the Uncompahgre Plateau. *Annual Report, Mammals Program, Colorado Division of Parks and Wildlife* (2013).
2. United States Census Bureau. Census of population and housing: summary tape file 1 on CD ROM (Colorado). (2010). <https://www.nhgis.org>.
3. United States Census Bureau. Census of population and housing: summary tape file 1 on CD ROM (Colorado). (1990). <https://www.nhgis.org>.
4. United States Census Bureau. TIGER/Line Mapping Service: Colorado state. (2010). [www.census.gov/geo/maps-data/data/tiger-line.html](http://www.census.gov/geo/maps-data/data/tiger-line.html).
5. Theobald, D. M. Landscape patterns of exurban growth in the USA from 1980 to 2020. *Ecol. Soc.* **10**, 32 (2005).
6. Huwer, S. & Kraft, B. D-27 Boulder Creek deer herd management plan. *Colorado Parks and Wildlife* (2012).
7. Alldredge, M. W. Cougar demographics and human interactions along the urban-exurban Front-Range of Colorado. *Annual Report, Mammals Research, Colorado Parks and Wildlife* (2011).
8. Logan, K. A. Puma population structure and vital rates on the Uncompahgre Plateau. *Annual Report, Mammals Research, Colorado Parks and Wildlife* (2009).
9. Kertson, B. N., Spencer, R. D. & Grue, C. E. Cougar prey use in a wildland–urban environment in western Washington. *Northwest. Nat.* **92**, 175–185 (2011).
10. Knopff, K. H., Knopff, A. A., Kortello, A. & Boyce, M. S. Cougar kill rate and prey composition in a multiprey system. *J. Wildl. Manage.* **74**, 1435–1447 (2010).
11. Pauli, J. N., Ben-David, M., Buskirk, S. W., DePue, J. E. & Smith, W. P. An isotopic technique to mark mid-sized vertebrates non-invasively. *J. Zool.* **278**, 141–148 (2009).
12. Roth, J. D. & Hobson, K. A. Stable carbon and nitrogen isotopic fractionation between diet and tissue of captive red fox: implications for dietary reconstruction. *Can. J. Zool.* **78**, 848–852 (2000).
13. Rosing, M. N., Ben-David, M. & Barry, R. P. Analysis of stable isotope data: a K nearest-neighbors randomization test. *J. Wildl. Manage.* **62**, 380–388 (1998).

## Niche expansion in an apex predator

14. Sonnerup, R. E. *et al.* Reconstructing the oceanic <sup>13</sup>C Suess Effect. *Global Biogeochem. Cycles* **13**, 857–872 (1999).
15. Hopkins, J. B. & Ferguson, J. M. Estimating the diets of animals using stable isotopes and a comprehensive Bayesian mixing model. *PLoS One* **7**, e28478 (2012).
16. Parnell, A., Inger, R., Bearhop, S. & Jackson, A. L. SIAR: stable isotope analysis in R. (2008).
17. Jackson, A. L., Inger, R., Parnell, A. C. & Bearhop, S. Comparing isotopic niche widths among and within communities: SIBER - Stable Isotope Bayesian Ellipses in R. *J. Anim. Ecol.* **80**, 595–602 (2011).
18. Newsome, S. D., del Rio, C. M., Bearhop, S. & Phillips, D. L. A niche for isotopic ecology. *Front. Ecol. Environ.* **5**, 429–436 (2007).
19. Flaherty, E. A. & Ben-David, M. Overlap and partitioning of the ecological and isotopic niches. *Oikos* **119**, 1409–1416 (2010).
20. Parnell, A. C., Inger, R., Bearhop, S. & Jackson, A. L. Source Partitioning Using Stable Isotopes: Coping with Too Much Variation. *PLoS One* **5**, (2010).
20. Moss, W. E., Alldredge, M. W. & Pauli, J. N. Quantifying risk and resource use for a large carnivore in an expanding urban–wildland interface. *J Appl Ecol* **53**, 371–378 (2016).
21. Logan, K. A. & Sweanor, L. L. *Desert puma: evolutionary ecology and conservation of an enduring carnivore*. (Island Press, 2001).
